# Supplementary material for: Ba3Ca4(BO3)3(SiO4)Cl: a new non-centrosymmetric complex alkaline-earth metal borosilicate chloride with a deep-ultraviolet cut-off edge
Source: Royal Society of Chemistry journal article supplement (doi:10.1039/c9qi00670b), 2019-01-01
Supplement: c9qi00670b1.pdf [file c9qi00670b1.pdf]

**Electronic Supplementary Information**

**Ba<sub>3</sub>Ca<sub>4</sub>(BO<sub>3</sub>)<sub>3</sub>(SiO<sub>4</sub>)Cl: a new non-centrosymmetric complex  
alkaline-earth metal borosilicate chloride with  
deep-ultraviolet cut-off edge**

Zixiu Lu,<sup>a,b,#</sup> Fangfang Zhang,<sup>a,b,#</sup> Abudukadi Tudi,<sup>a,b</sup> Sujuan Yu,<sup>a</sup> Zhihua

Yang<sup>a,b</sup> and Shilie Pan<sup>a,b,\*</sup>

<sup>a</sup>CAS Key Laboratory of Functional Materials and Devices for Special Environments;  
Xinjiang Technical Institute of Physics & Chemistry, CAS; Xinjiang Key Laboratory  
of Electronic Information Materials and Devices, 40-1 South Beijing Road, Urumqi  
830011, China.

<sup>b</sup>Center of Materials Science and Optoelectronics Engineering, University of Chinese  
Academy of Sciences, Beijing 100049, China.

<sup>#</sup>These authors contributed equally to this work.

\*Corresponding author: slpan@ms.xjb.ac.cn.

**Table S1.** Atomic coordinates ( $\times 10^4$ ), equivalent isotropic displacement parameters ( $\text{\AA}^2 \times 10^3$ ) for  $\text{Ba}_3\text{Ca}_4(\text{BO}_3)_3(\text{SiO}_4)\text{Cl}$ .  $U_{\text{(eq)}}$  is defined as one third of the trace of the orthogonalized  $U_{ij}$  tensor.

| Atoms | $x$     | $y$      | $z$      | $U_{\text{(eq)}}$ | BVS |
|-------|---------|----------|----------|-------------------|-----|
| Ba(1) | 1476(1) | 2953(1)  | 3479(1)  | 12(1)             | 2.1 |
| Ca(1) | 4765(1) | 5235(1)  | -54(3)   | 12(1)             | 1.9 |
| Ca(2) | 3333    | 6667     | 6247(6)  | 16(1)             | 1.7 |
| Si(1) | 3333    | 6667     | 2094(10) | 28(1)             | 4.0 |
| B(1)  | 8063(5) | 6125(10) | 2927(15) | 11(2)             | 3.1 |
| Cl(1) | 0       | 0        | 1203(8)  | 19(1)             | 1.0 |
| O(1)  | 3333    | 6667     | -280(20) | 26(3)             | 1.8 |
| O(2)  | 6825(5) | 5842(5)  | 1971(8)  | 21(1)             | 2.0 |
| O(3)  | 4146(3) | 8291(6)  | 3018(8)  | 17(2)             | 2.0 |
| O(4)  | 8355(5) | 6711(10) | 4699(13) | 41(2)             | 1.9 |

**Table S2.** Selected bond lengths (Å) and angles (°) for Ba<sub>3</sub>Ca<sub>4</sub>(BO<sub>3</sub>)<sub>3</sub>(SiO<sub>4</sub>)Cl.

|                     |            |                       |            |
|---------------------|------------|-----------------------|------------|
| Ba(1)-O(4)#1        | 2.602(9)   | Ca(1)-O(4)#10         | 2.944(6)   |
| Ba(1)-O(2)#2        | 2.890(5)   | Ca(2)-O(1)#11         | 2.376(15)  |
| Ba(1)-O(2)#3        | 2.890(5)   | Ca(2)-O(2)#12         | 2.666(5)   |
| Ba(1)-O(2)#4        | 2.961(5)   | Ca(2)-O(2)#13         | 2.666(5)   |
| Ba(1)-O(2)#5        | 2.961(5)   | Ca(2)-O(2)#14         | 2.666(5)   |
| Ba(1)-O(3)#6        | 3.0236(12) | Ca(2)-O(2)#2          | 2.666(5)   |
| Ba(1)-O(3)#4        | 3.0236(12) | Ca(2)-O(2)#15         | 2.666(5)   |
| Ba(1)-O(4)#4        | 3.040(6)   | Ca(2)-O(2)#3          | 2.666(5)   |
| Ba(1)-O(4)#7        | 3.040(6)   | Ca(2)-O(3)#6          | 2.677(6)   |
| Ba(1)-Cl(1)#1       | 3.324(3)   | Ca(2)-O(3)            | 2.677(6)   |
| Ba(1)-Cl(1)         | 3.162(3)   | Ca(2)-O(3)#4          | 2.677(6)   |
| Ca(1)-O(3)#4        | 2.396(6)   | Si(1)-O(1)            | 1.619(15)  |
| Ca(1)-O(2)          | 2.412(5)   | Si(1)-O(3)            | 1.641(6)   |
| Ca(1)-O(2)#5        | 2.412(5)   | Si(1)-O(3)#6          | 1.641(6)   |
| Ca(1)-O(3)#8        | 2.422(6)   | Si(1)-O(3)#4          | 1.641(6)   |
| Ca(1)-O(2)#1        | 2.535(5)   | B(1)-O(4)             | 1.328(14)  |
| Ca(1)-O(2)#9        | 2.535(5)   | B(1)-O(2)             | 1.374(7)   |
| Ca(1)-O(1)          | 2.6734(19) | B(1)-O(2)#16          | 1.374(7)   |
| Ca(1)-O(4)#1        | 2.944(6)   |                       |            |
| O(4)#1-Ba(1)-O(2)#2 | 140.61(19) | O(2)#5-Ca(1)-O(4)#10  | 142.5(2)   |
| O(4)#1-Ba(1)-O(2)#3 | 140.61(19) | O(3)#8-Ca(1)-O(4)#10  | 106.31(16) |
| O(2)#2-Ba(1)-O(2)#3 | 48.19(18)  | O(2)#1-Ca(1)-O(4)#10  | 114.1(2)   |
| O(4)#1-Ba(1)-O(2)#4 | 69.27(10)  | O(2)#9-Ca(1)-O(4)#10  | 50.1(2)    |
| O(2)#2-Ba(1)-O(2)#4 | 83.02(11)  | O(1)-Ca(1)-O(4)#10    | 68.01(15)  |
| O(2)#3-Ba(1)-O(2)#4 | 129.93(14) | O(4)#1-Ca(1)-O(4)#10  | 135.8(3)   |
| O(4)#1-Ba(1)-O(2)#5 | 69.27(10)  | O(1)#11-Ca(2)-O(2)#12 | 79.31(14)  |
| O(2)#2-Ba(1)-O(2)#5 | 129.93(14) | O(1)#11-Ca(2)-O(2)#13 | 79.31(14)  |
| O(2)#3-Ba(1)-O(2)#5 | 83.02(11)  | O(2)#12-Ca(2)-O(2)#13 | 52.53(18)  |
| O(2)#4-Ba(1)-O(2)#5 | 138.4(2)   | O(1)#11-Ca(2)-O(2)#14 | 79.31(14)  |
| O(4)#1-Ba(1)-O(3)#6 | 77.8(2)    | O(2)#12-Ca(2)-O(2)#14 | 65.18(19)  |
| O(2)#2-Ba(1)-O(3)#6 | 63.94(14)  | O(2)#13-Ca(2)-O(2)#14 | 116.64(8)  |
| O(2)#3-Ba(1)-O(3)#6 | 85.12(14)  | O(1)#11-Ca(2)-O(2)#2  | 79.31(14)  |
| O(2)#4-Ba(1)-O(3)#6 | 59.70(13)  | O(2)#12-Ca(2)-O(2)#2  | 116.64(8)  |
| O(2)#5-Ba(1)-O(3)#6 | 107.87(14) | O(2)#13-Ca(2)-O(2)#2  | 65.18(19)  |
| O(4)#1-Ba(1)-O(3)#4 | 77.8(2)    | O(2)#14-Ca(2)-O(2)#2  | 157.7(3)   |
| O(2)#2-Ba(1)-O(3)#4 | 85.12(14)  | O(1)#11-Ca(2)-O(2)#15 | 79.31(14)  |
| O(2)#3-Ba(1)-O(3)#4 | 63.94(14)  | O(2)#12-Ca(2)-O(2)#15 | 116.64(8)  |
| O(2)#4-Ba(1)-O(3)#4 | 107.87(14) | O(2)#13-Ca(2)-O(2)#15 | 157.7(3)   |
| O(2)#5-Ba(1)-O(3)#4 | 59.70(13)  | O(2)#14-Ca(2)-O(2)#15 | 52.53(18)  |
| O(3)#6-Ba(1)-O(3)#4 | 51.4(2)    | O(2)#2-Ca(2)-O(2)#15  | 116.64(8)  |

|                     |            |                      |            |
|---------------------|------------|----------------------|------------|
| O(4)#1-Ba(1)-O(4)#4 | 108.71(17) | O(1)#11-Ca(2)-O(2)#3 | 79.31(14)  |
| O(2)#2-Ba(1)-O(4)#4 | 64.71(17)  | O(2)#12-Ca(2)-O(2)#3 | 157.7(3)   |
| O(2)#3-Ba(1)-O(4)#4 | 106.64(18) | O(2)#13-Ca(2)-O(2)#3 | 116.64(8)  |
| O(2)#4-Ba(1)-O(4)#4 | 46.10(19)  | O(2)#14-Ca(2)-O(2)#3 | 116.64(8)  |
| O(2)#5-Ba(1)-O(4)#4 | 160.14(17) | O(2)#2-Ca(2)-O(2)#3  | 52.53(18)  |
| O(3)#6-Ba(1)-O(4)#4 | 90.48(18)  | O(2)#15-Ca(2)-O(2)#3 | 65.18(19)  |
| O(3)#4-Ba(1)-O(4)#4 | 140.07(18) | O(1)#11-Ca(2)-O(3)#6 | 145.53(13) |
| O(4)#1-Ba(1)-O(4)#7 | 108.71(17) | O(2)#12-Ca(2)-O(3)#6 | 96.98(12)  |
| O(2)#2-Ba(1)-O(4)#7 | 106.64(18) | O(2)#13-Ca(2)-O(3)#6 | 71.80(15)  |
| O(2)#3-Ba(1)-O(4)#7 | 64.71(17)  | O(2)#14-Ca(2)-O(3)#6 | 130.50(19) |
| O(2)#4-Ba(1)-O(4)#7 | 160.14(17) | O(2)#2-Ca(2)-O(3)#6  | 71.80(15)  |
| O(2)#5-Ba(1)-O(4)#7 | 46.10(19)  | O(2)#15-Ca(2)-O(3)#6 | 130.50(18) |
| O(3)#6-Ba(1)-O(4)#7 | 140.07(18) | O(2)#3-Ca(2)-O(3)#6  | 96.98(12)  |
| O(3)#4-Ba(1)-O(4)#7 | 90.48(18)  | O(1)#11-Ca(2)-O(3)   | 145.53(13) |
| O(4)#4-Ba(1)-O(4)#7 | 121.8(3)   | O(2)#12-Ca(2)-O(3)   | 71.80(15)  |
| O(4)#1-Ba(1)-Cl(1)  | 67.5(2)    | O(2)#13-Ca(2)-O(3)   | 96.98(12)  |
| O(2)#2-Ba(1)-Cl(1)  | 138.15(12) | O(2)#14-Ca(2)-O(3)   | 71.80(15)  |
| O(2)#3-Ba(1)-Cl(1)  | 138.15(12) | O(2)#2-Ca(2)-O(3)    | 130.50(19) |
| O(2)#4-Ba(1)-Cl(1)  | 83.67(10)  | O(2)#15-Ca(2)-O(3)   | 96.98(12)  |
| O(2)#5-Ba(1)-Cl(1)  | 83.67(9)   | O(2)#3-Ca(2)-O(3)    | 130.50(18) |
| O(3)#6-Ba(1)-Cl(1)  | 136.72(13) | O(3)#6-Ca(2)-O(3)    | 58.7(2)    |
| O(3)#4-Ba(1)-Cl(1)  | 136.72(13) | O(1)#11-Ca(2)-O(3)#4 | 145.53(13) |
| O(4)#4-Ba(1)-Cl(1)  | 77.62(15)  | O(2)#12-Ca(2)-O(3)#4 | 130.50(19) |
| O(4)#7-Ba(1)-Cl(1)  | 77.62(14)  | O(2)#13-Ca(2)-O(3)#4 | 130.50(19) |
| O(3)#4-Ca(1)-O(2)   | 76.59(17)  | O(2)#14-Ca(2)-O(3)#4 | 96.98(12)  |
| O(3)#4-Ca(1)-O(2)#5 | 76.59(17)  | O(2)#2-Ca(2)-O(3)#4  | 96.98(12)  |
| O(2)-Ca(1)-O(2)#5   | 73.1(2)    | O(2)#15-Ca(2)-O(3)#4 | 71.80(15)  |
| O(3)#4-Ca(1)-O(3)#8 | 151.75(19) | O(2)#3-Ca(2)-O(3)#4  | 71.80(15)  |
| O(2)-Ca(1)-O(3)#8   | 80.80(16)  | O(3)#6-Ca(2)-O(3)#4  | 58.7(2)    |
| O(2)#5-Ca(1)-O(3)#8 | 80.80(16)  | O(3)-Ca(2)-O(3)#4    | 58.7(2)    |
| O(3)#4-Ca(1)-O(2)#1 | 127.74(15) | O(1)-Si(1)-O(3)      | 112.6(3)   |
| O(2)-Ca(1)-O(2)#1   | 154.64(15) | O(1)-Si(1)-O(3)#6    | 112.6(3)   |
| O(2)#5-Ca(1)-O(2)#1 | 103.24(17) | O(3)-Si(1)-O(3)#6    | 106.1(3)   |
| O(3)#8-Ca(1)-O(2)#1 | 73.85(15)  | O(1)-Si(1)-O(3)#4    | 112.6(3)   |
| O(3)#4-Ca(1)-O(2)#9 | 127.74(14) | O(3)-Si(1)-O(3)#4    | 106.1(3)   |
| O(2)-Ca(1)-O(2)#9   | 103.24(17) | O(3)#6-Si(1)-O(3)#4  | 106.1(3)   |
| O(2)#5-Ca(1)-O(2)#9 | 154.64(15) | O(2)#9-Ca(1)-O(1)    | 76.5(3)    |
| O(3)#8-Ca(1)-O(2)#9 | 73.85(15)  | O(3)#4-Ca(1)-O(4)#1  | 82.60(17)  |
| O(2)#1-Ca(1)-O(2)#9 | 69.0(2)    | O(2)-Ca(1)-O(4)#1    | 142.5(2)   |
| O(3)#4-Ca(1)-O(1)   | 64.4(3)    | O(2)#5-Ca(1)-O(4)#1  | 71.96(19)  |
| O(2)-Ca(1)-O(1)     | 126.4(2)   | O(3)#8-Ca(1)-O(4)#1  | 106.31(16) |
| O(2)#5-Ca(1)-O(1)   | 126.4(2)   | O(2)#1-Ca(1)-O(4)#1  | 50.1(2)    |
| O(3)#8-Ca(1)-O(1)   | 143.8(3)   | O(2)#9-Ca(1)-O(4)#1  | 114.1(2)   |
| O(2)#1-Ca(1)-O(1)   | 76.5(3)    | O(1)-Ca(1)-O(4)#1    | 68.01(15)  |

|                      |           |                    |           |
|----------------------|-----------|--------------------|-----------|
| O(3)#4-Ca(1)-O(4)#10 | 82.60(17) | O(2)-Ca(1)-O(4)#10 | 71.96(19) |
| O(4)-B(1)-O(2)       | 120.8(4)  | O(2)-B(1)-O(2)#16  | 118.3(9)  |
| O(4)-B(1)-O(2)#16    | 120.8(4)  |                    |           |

---

Symmetry transformations used to generate equivalent atoms:

|     |                     |     |                    |     |                       |
|-----|---------------------|-----|--------------------|-----|-----------------------|
| #1  | $-x+1, -y+1, z-1/2$ | #2  | $x-y, -y+1, z+1/2$ | #3  | $-x+1, -y+1, z+1/2$   |
| #4  | $-x+y, -x+1, z$     | #5  | $-y+1, -x+1, z$    | #6  | $-y+1, x-y+1, z$      |
| #7  | $-y+1, x-y, z$      | #8  | $x-y+1, x, z-1/2$  | #9  | $y, x, z-1/2$         |
| #10 | $y, -x+y+1, z-1/2$  | #11 | $x, y, z+1$        | #12 | $-x+1, -x+y+1, z+1/2$ |
| #13 | $x-y, x, z+1/2$     | #14 | $y, -x+y+1, z+1/2$ | #15 | $y, x, z+1/2$         |
| #16 | $-x+y+1, y, z$      | #17 | $x-y+1, x, z+1/2$  | #18 | $-x+y+1, -x+1, z$     |
| #19 | $-x+y, -x, z$       | #20 | $-y, x-y, z$       | #21 | $-x, -y, z-1/2$       |
| #22 | $x-y, x, z-1/2$     | #23 | $y, -x+y, z-1/2$   | #24 | $x, y, z-1$           |

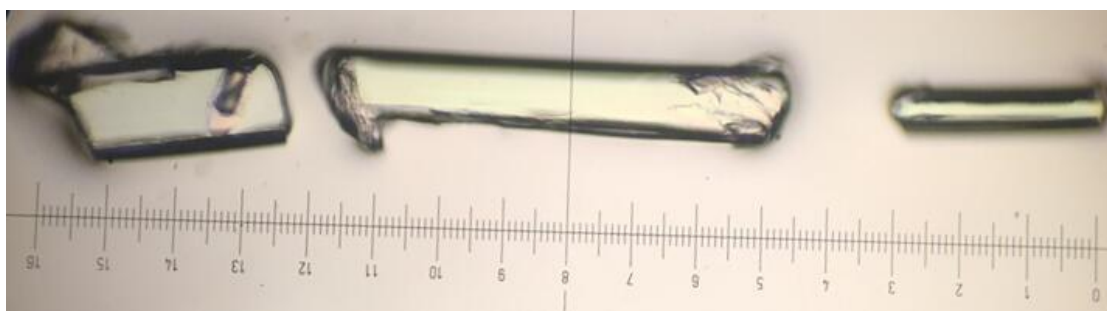

**Figure S1.** Strip shaped crystals of Ba<sub>3</sub>Ca<sub>4</sub>(BO<sub>3</sub>)<sub>3</sub>(SiO<sub>4</sub>)Cl.

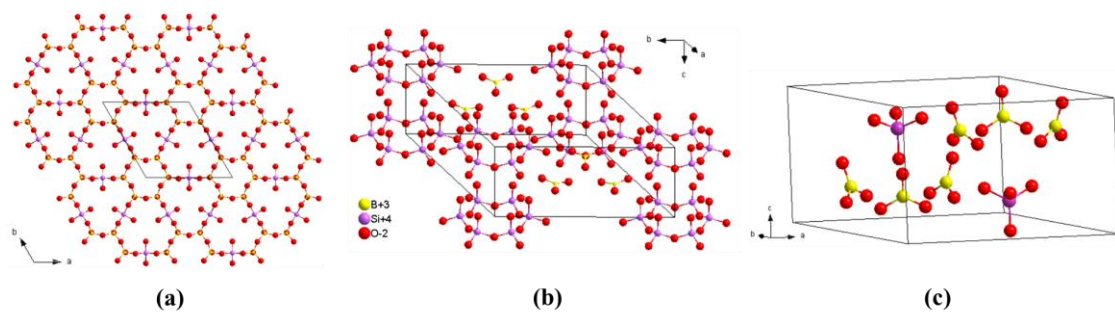

**Figure S2.** (a)  $[\text{Si}_3\text{B}_6\text{O}_{24}]$  layer in  $\text{BaY}_6\text{B}_6\text{Si}_3\text{O}_{24}\text{F}_2$ ; (b) Isolated  $[\text{BO}_3]$  and  $[\text{Si}_6\text{O}_{18}]$  in  $\text{NaAl}_6\text{B}_3\text{Fe}_3\text{Si}_6\text{O}_3\text{F}$ ; (c) Isolated  $[\text{BO}_3]$  and  $[\text{SiO}_4]$  in  $\text{Ba}_7(\text{BO}_3)(\text{SiO}_4)\text{X}$  ( $\text{X} = \text{Cl}, \text{Br}$ ).

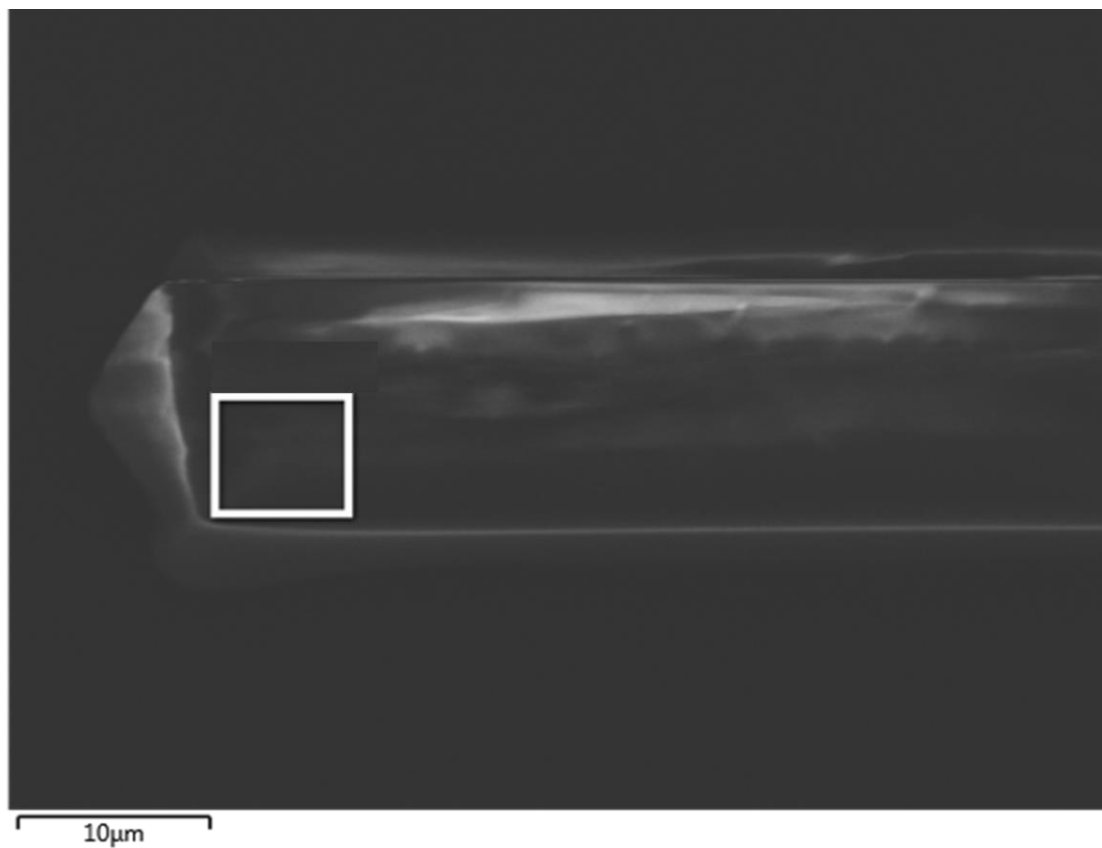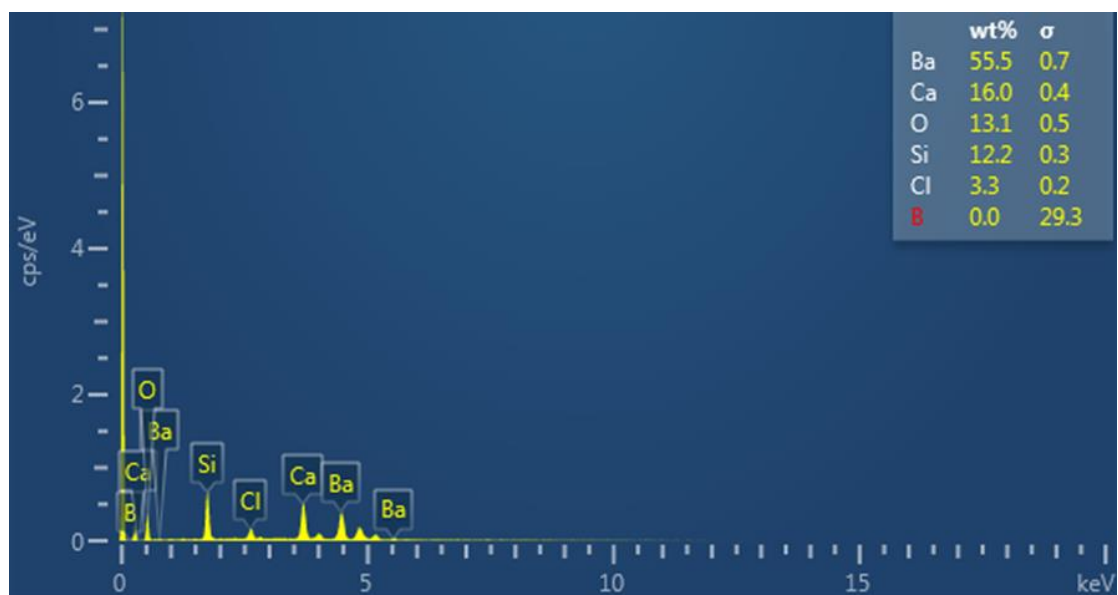

**Figure S3.** EDS of Ba<sub>3</sub>Ca<sub>4</sub>(BO<sub>3</sub>)<sub>3</sub>(SiO<sub>4</sub>)Cl single crystal.



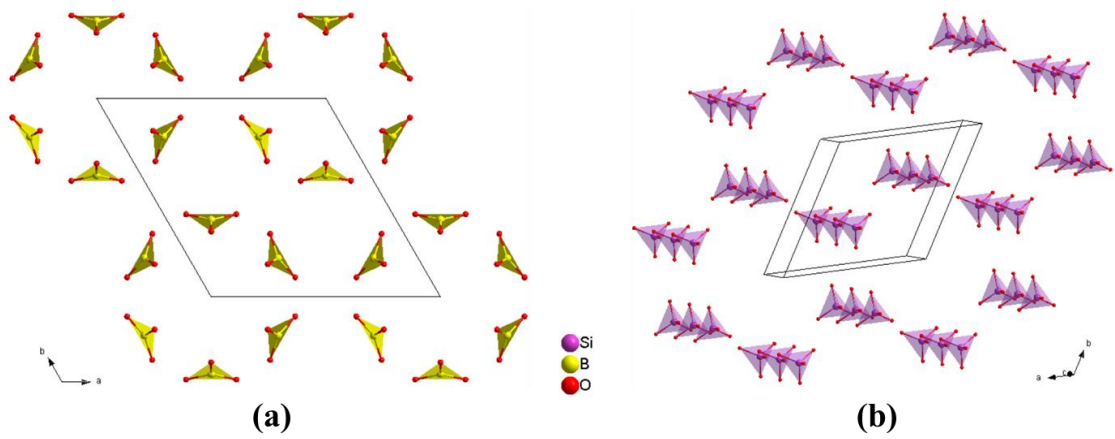

**Figure S4** Arrangement of  $\text{BO}_3$  and  $\text{SiO}_4$  groups in  $\text{Ba}_3\text{Ca}_4(\text{BO}_3)_3(\text{SiO}_4)\text{Cl}$ . (a) the  $\text{BO}_3$  groups; (b) the  $\text{SiO}_4$  groups.

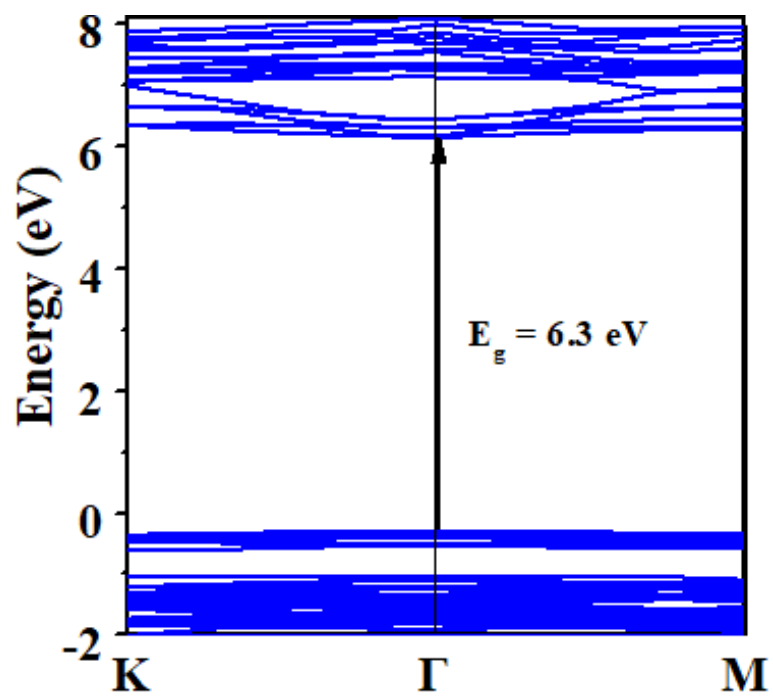

Figure S5 Calculated band structure of Ba<sub>3</sub>Ca<sub>4</sub>(BO<sub>3</sub>)<sub>3</sub>(SiO<sub>4</sub>)Cl by HSE06
